# Supplementary material
Source: PubMed Central journal article supplement (PMC4306663)
Supplement: jcbn14-67s02.pdf [file jcbn14-67s02.pdf]

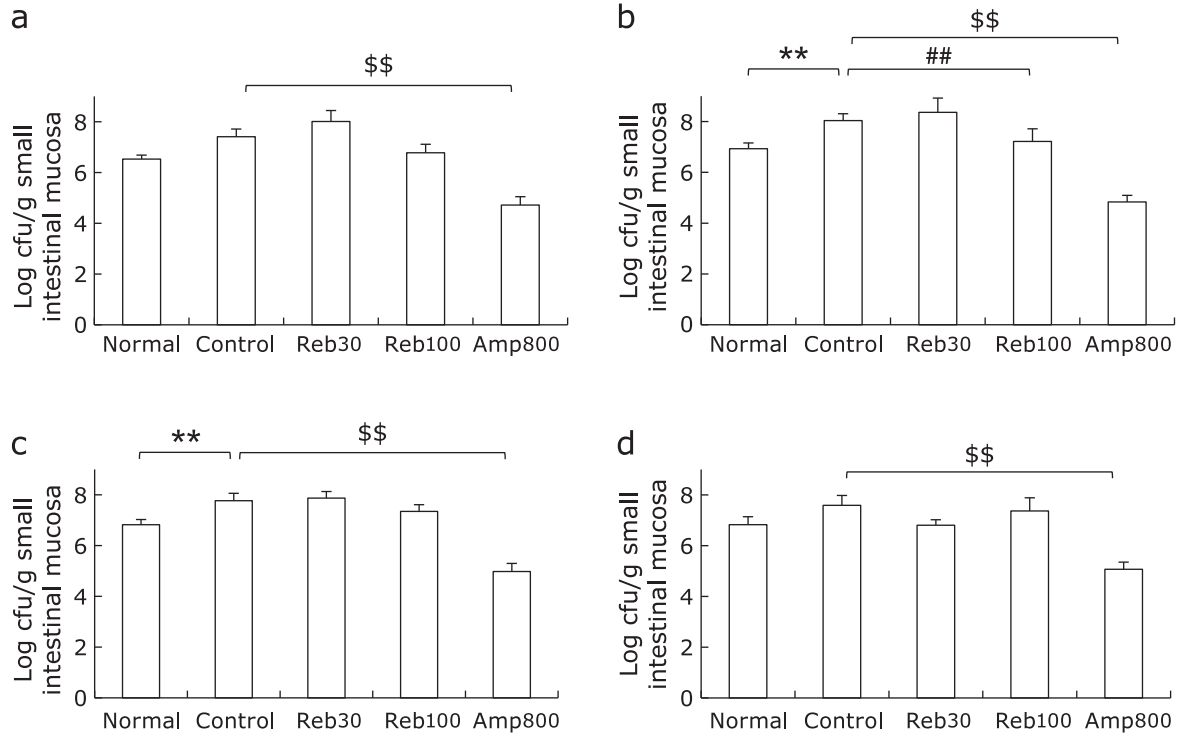

**Supplemental Fig. 2.** Viable bacterial counts by anaerobic culture in the small intestinal mucosa (cfu/g). (A) proximal jejunum, (B) mid-jejunum, (C) distal jejunum, (D) ileum. \*\* $p < 0.01$  normal vs control by *t* test (two-tailed), ## $p < 0.01$  rebamipide vs control by Dunnett test (two-tailed), \$\$ $p < 0.01$  ampicillin vs control by *t* test (two-tailed).
