# Supplementary material
Source: PubMed Central journal article supplement (PMC4306663)
Supplement: jcbn14-67st01.pdf [file jcbn14-67st01.pdf]

**Supplemental Table 1.** Primers used in this study

| Target bacterial group         | Primer      | Sequence (5' to 3')      | Tm (°C) | References |
|--------------------------------|-------------|--------------------------|---------|------------|
| <i>Lactobacillus</i>           | g-Lact-1    | AGCAGTAGGGAATCTTCCA      | 88.9    | 21         |
|                                | g-Lact-2    | CACCGCTACACATGGAG        |         |            |
| Segmented filamentous bacteria | SFB-F       | AGGAGGAGTCTGCGGCACATTAGC | 85      | 18         |
|                                | SFB-R       | TCCCCACTGCTGCCTCCCGTAG   |         |            |
| <i>Enterococcus</i>            | g-Enteroc-F | CCCTTATTGTTAGTTGCCATCATT | 84.3    | 19         |
|                                | g-Enteroc-R | ACTCGTTGTACYCCATTGT      |         |            |
| <i>Enterobacteriaceae</i>      | En-Isu-3F   | TGCCGTAACCTCGGGAGAAGGCA  | 83      | 20         |
|                                | En-Isu-3R   | TCAAGGACCAGTGTTCAAGTGTC  |         |            |
