# Supplementary material
Source: PubMed Central journal article supplement (PMC4306663)
Supplement: jcbn14-67st02.pdf [file jcbn14-67st02.pdf]

**Supplemental Table 2.** Culture media used for isolation of intestinal microbiota in Normal rats

| Bacteria identified                               | Cultured media |
|---------------------------------------------------|----------------|
| <i>Lactobacillus johnsonii</i>                    | GAM Agar       |
| <i>Lactobacillus reuteri</i>                      | GAM Agar       |
| <i>Lactobacillus gallinarum</i>                   | GAM Agar       |
| <i>Lactobacillus johnsonii</i>                    | GAM Agar       |
| <i>Lactobacillus johnsonii</i>                    | GAM Agar       |
| <i>Lactobacillus johnsonii</i>                    | Blood Agar     |
| <i>Escherichia coli</i>                           | MacConkey Agar |
| <i>Enterococcus faecalis</i>                      | Blood Agar     |
| Non-identified bacterium <i>Lactobacillus</i> sp. | Blood Agar     |
| <i>Lactobacillus johnsonii</i>                    | Blood Agar     |

Ten bacterial strains cultured on MacConkey agar plate, BHI agar supplemented with 7% horse blood and GAM agar medium by aerobic or anaerobic culture were identified by 16S rRNA sequencing in Normal rats.
